# Supplementary material for: Control of Drosophila Blood Cell Activation via Toll Signaling in the Fat Body
Source: PubMed Central journal article supplement (PMC4125153; doi:10.1371/journal.pone.0102568), 2014-08-07
Supplement: pone.0102568.s001.pdf [file pone.0102568.s001.pdf]

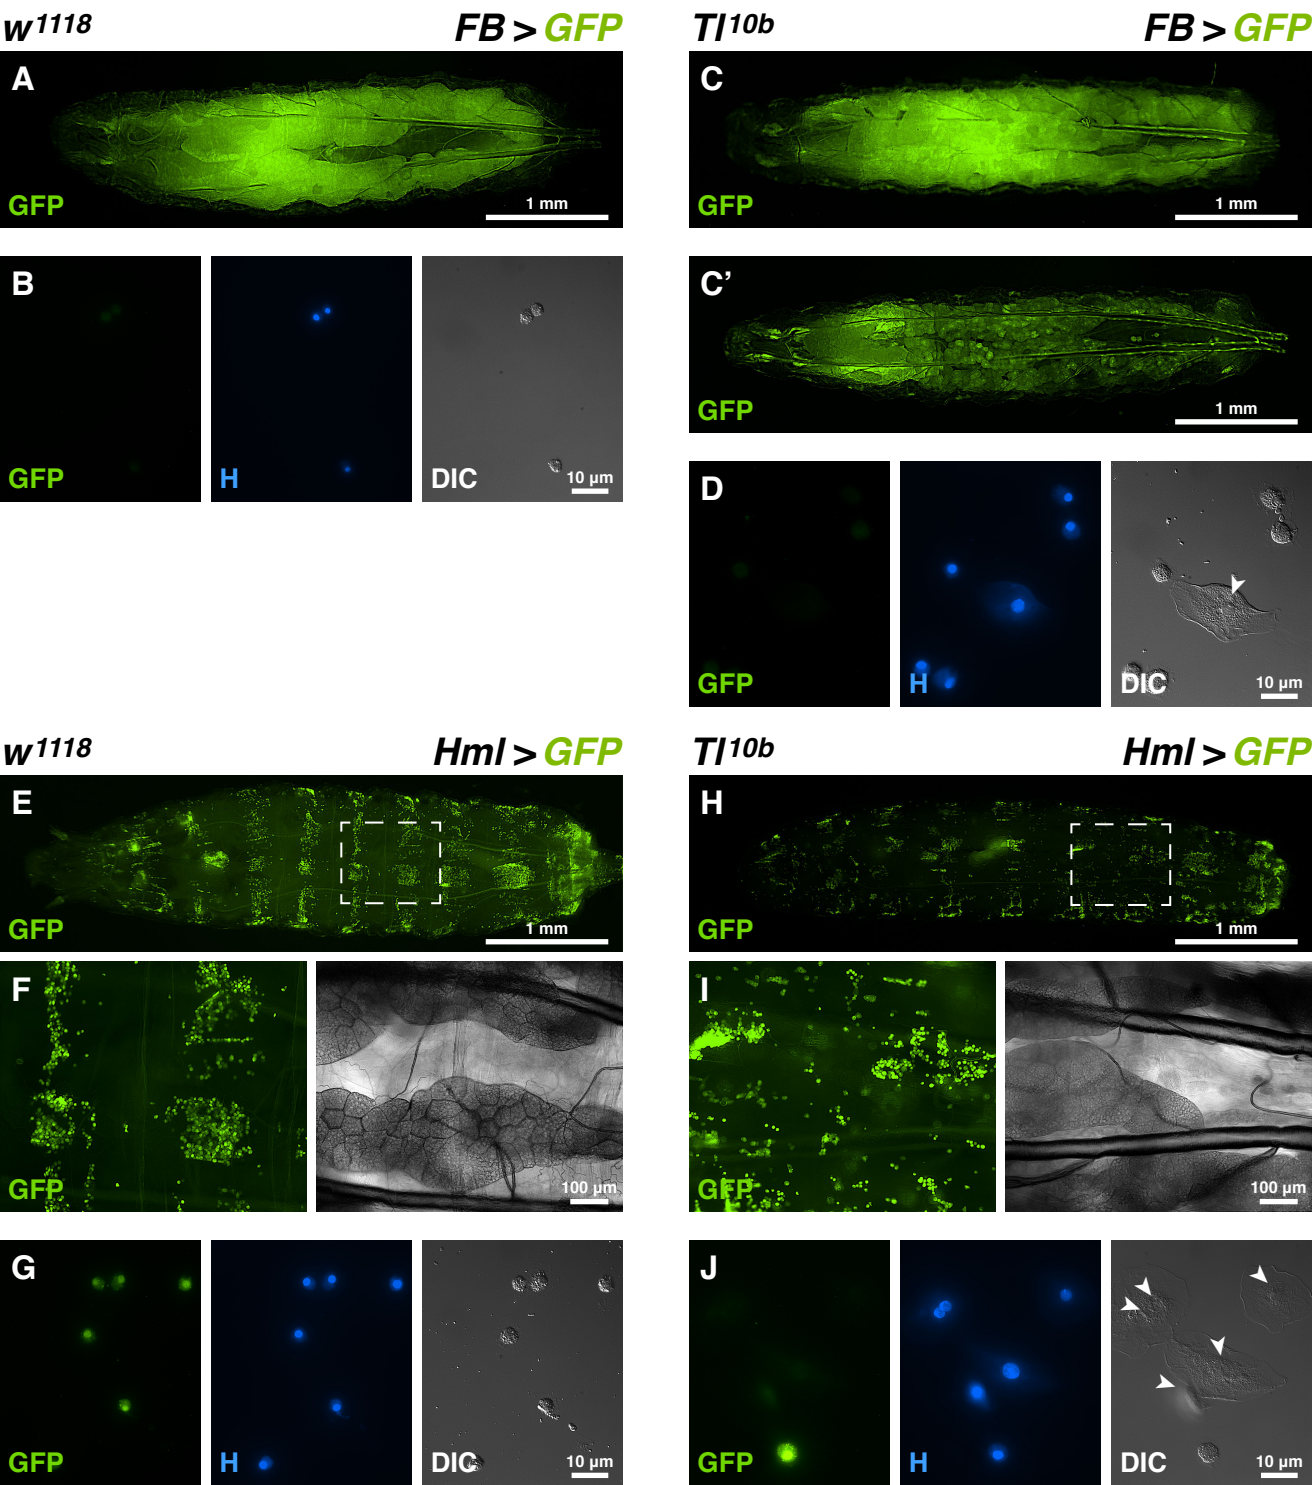

**Figure S1. Tissue specificity of the *FB* and *Hml* drivers.** The expression of the *FB*-*Gal4* (A-D) and *Hml*<sup>Δ</sup>-*Gal4* (E-J) drivers was visualized by GFP fluorescence after crossing to the *UAS*-GFP reporter. Similar patterns were seen in *Toll* wild-type (A-B, E-G) and *Toll*<sup>10b</sup> genetic background (C-D, H-J). Panels A, C, C', E and H show whole-body images of the GFP fluorescence. The demarcated areas in E and H are shown enlarged in panels F and I (bright-field images to the right). The fat body morphology in many, but not all *Toll*<sup>10b</sup> larvae is partially disrupted (compare C and C'). Panels B, D, G and J show hemolymph samples, in each case visualized by GFP fluorescence (GFP), Hoechst fluorescence (H) and differential interference contrast (DIC). Lamellocytes are marked by white arrowheads.
