# Supplementary material for: Control of Drosophila Blood Cell Activation via Toll Signaling in the Fat Body
Source: PubMed Central journal article supplement (PMC4125153; doi:10.1371/journal.pone.0102568), 2014-08-07
Supplement: pone.0102568.s002.pdf [file pone.0102568.s002.pdf]

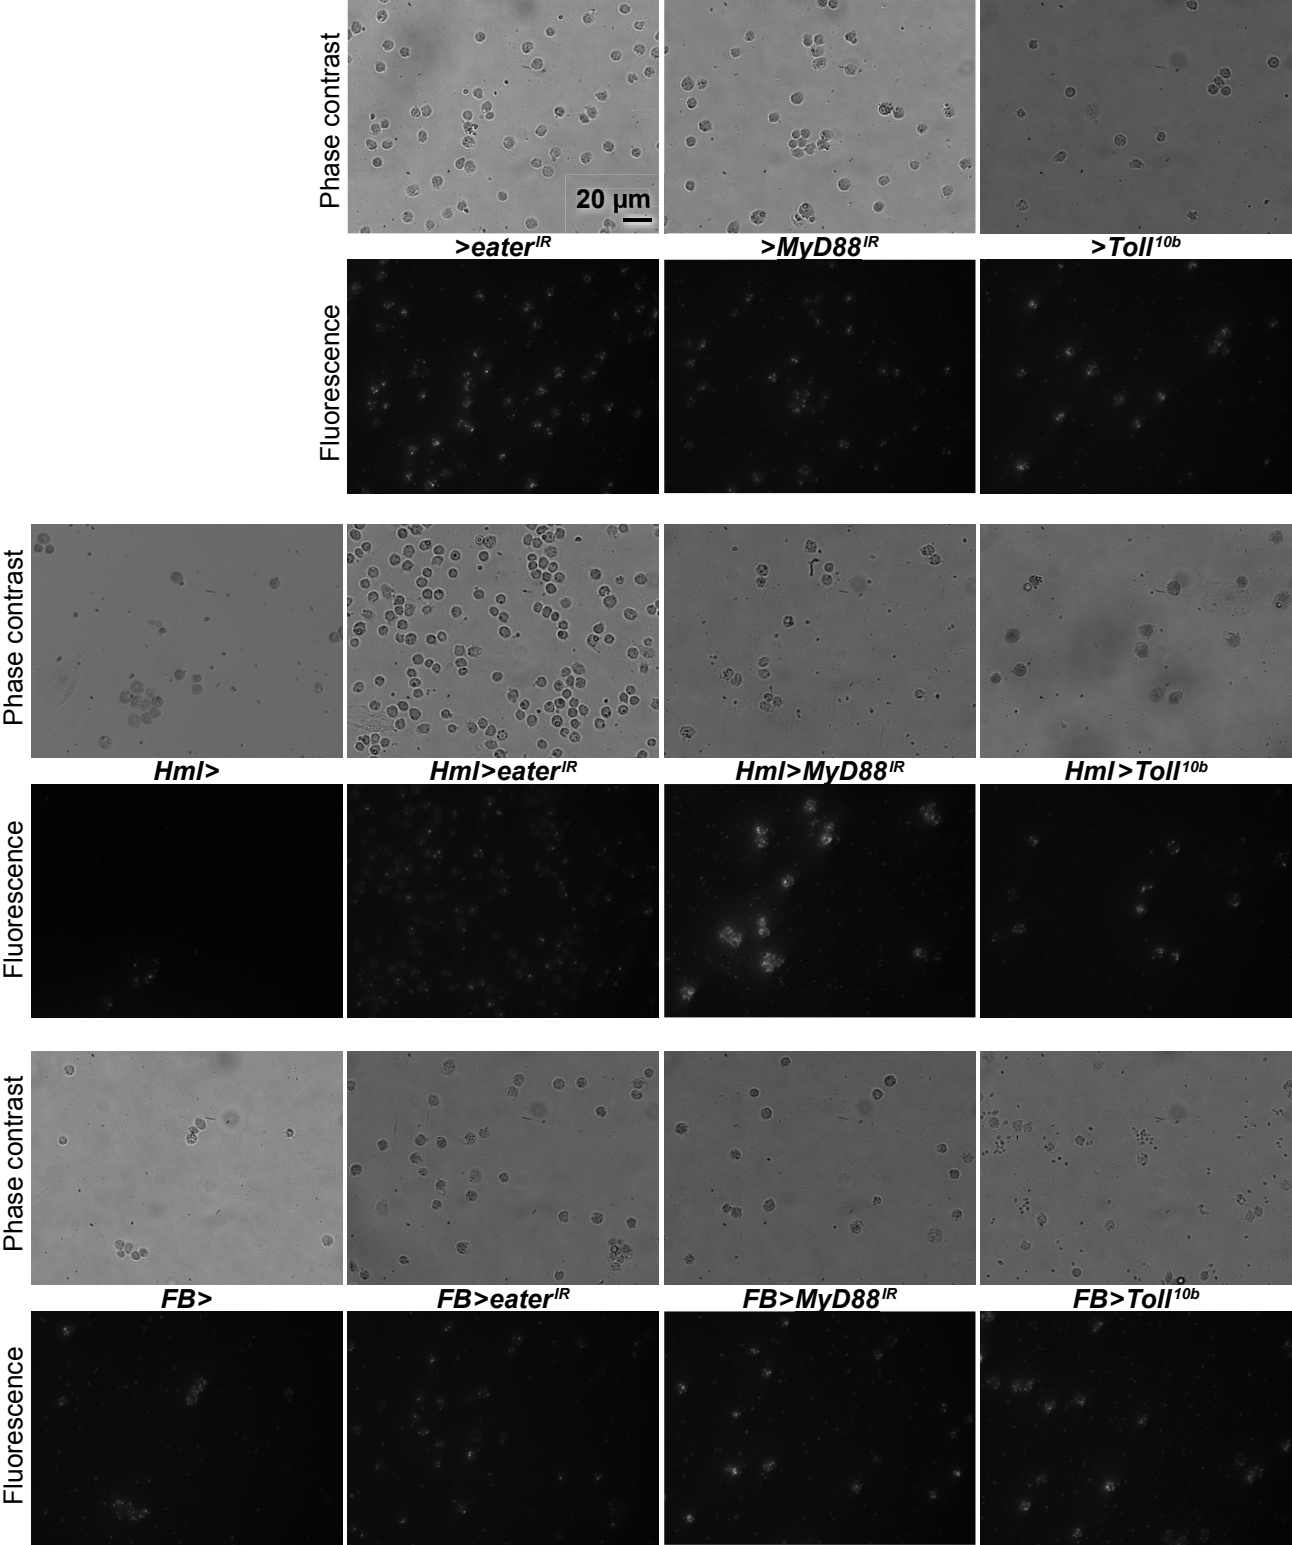

**Figure S2. No effect of Toll signaling on the phagocytosis of bacteria.** Toll signaling was activated by expression of *UAS-Toll<sup>10b</sup>* (*>Tl<sup>10b</sup>*), or suppressed by expression of *UAS-MyD88<sup>GD25399</sup>* (*>MyD88<sup>IR</sup>*), either in hemocytes by *Hml<sup>A</sup>-Gal4* (*Hml>*), or in fat body by *FB-Gal4* (*FB>*). As a control, the *eater* RNAi construct *ea<sup>GD4301</sup>* (*>eater<sup>IR</sup>*) was also tested, but gave little effect. Hemocytes from larvae with these genotypes were incubated with FITC-labeled *E. coli*, and the phagocytosed bacteria are visualized by fluorescence, after quenching of extracellular bacteria with trypan blue. The top rows show controls without drivers. The leftmost panels show the drivers alone.
